## 1 **Title**

2 Cochlear theta activity oscillates in phase opposition during interaural attention

## 3 **Abbreviated title**

4 Phase opposition of the cochlea's theta rhythm

## 5 **Authors**

6 Moritz Herbert Albrecht Köhler<sup>1,2</sup> and Nathan Weisz<sup>1,2,3</sup>

7

8 <sup>1</sup>Centre for Cognitive Neuroscience, University of Salzburg, Hellbrunner Straße 34,  
9 5020, Salzburg, Austria

10 <sup>2</sup>Department of Psychology, University of Salzburg, Hellbrunner Straße 34, 5020,  
11 Salzburg, Austria

12 <sup>3</sup>Neuroscience Institute, Christian Doppler University Hospital, Paracelsus Medical  
13 University, 5020 Salzburg, Austria

## 14 **Corresponding author**

15 [moritzherbertalbrecht.koehler@plus.ac.at](mailto:moritzherbertalbrecht.koehler@plus.ac.at) (MHA.K.)

## 16 **Acknowledgments**

17 We thank Konstantin Kölle for his help with the measurements and Daniel Walker for  
18 proofreading the manuscript. Moreover, we are grateful to Dr. Gianpaolo Demarchi for  
19 discussions and assistance concerning this project. This work was supported by the  
20 DOC Fellowship Programme of the Austrian Academy of Sciences.

## 21 **Conflict of interest**

22 The authors declare no competing financial interests.

## 23 **Abstract**

24 It is widely established that sensory perception is a rhythmic process as opposed to a  
25 continuous one. In the context of auditory perception this effect is only established on  
26 a cortical and behavioral level. Yet, the unique architecture of the auditory sensory  
27 system allows its primary sensory cortex to modulate the processes of its sensory  
28 receptors at the cochlear level. Previously, we could demonstrate the existence of a  
29 genuine cochlear theta (~6 Hz) rhythm that is modulated in amplitude by intermodal  
30 selective attention. As the study's paradigm was not suited to assess attentional effects  
31 on the oscillatory phase of cochlear activity the question whether attention can also  
32 affect the temporal organization of the cochlea's ongoing activity remained open. The  
33 present study utilizes an interaural attention paradigm to investigate ongoing  
34 otoacoustic activity during a stimulus-free cue-target interval and an omission period  
35 of the auditory target in humans. We were able to replicate the existence of the  
36 cochlear theta rhythm. Importantly, we found significant phase opposition between  
37 the two ears and attention conditions of anticipatory as well as cochlear oscillatory  
38 activity during target presentation. Yet, the amplitude was unaffected by interaural  
39 attention. These results are the first to demonstrate that intermodal and interaural  
40 attention deploy different aspects of excitation and inhibition at the first level of  
41 auditory processing. While intermodal attention modulates the level of cochlear  
42 activity, interaural attention modulates the timing.

43 **Keywords:** interaural attention, cochlea, otoacoustic, theta, phase, oscillation, phase  
44 opposition sum

## 45 **Introduction**

46           A large body of literature states that sensory perception is a rhythmic process  
47 rather than a continuous one. This is largely based on studies of brain rhythms that  
48 reflect the synchronized modulations of excitability of large ensembles of neurons  
49 (Kayser et al., 2015; Lakatos et al., 2005; Romei et al., 2008). Further evidence can be  
50 found on a behavioral level, in domains such as object exploration (Wöstmann et al.,  
51 2016; Wyart et al., 2012) or attentional modulations of perception (Busch & VanRullen,  
52 2010; Fiebelkorn et al., 2013). Frequencies in the range of the cortical theta-band (~3-8  
53 Hz) have also come into focus as being temporal organizers of perception.

54           Influential frameworks established on research in the visual modality suggest  
55 that an attention network operating in the theta frequency range assists in the  
56 temporal organization of neural activity associated with perception and action  
57 (Fiebelkorn & Kastner, 2019; Landau & Fries, 2012). Hence, large-scale theta rhythms  
58 possibly aid in preventing conflicts between sensory and motor functions. Beside  
59 modulations in power and frequency, according to these frameworks, the phase of  
60 theta rhythms putatively plays an essential role for how attentional sampling is  
61 deployed. For example, Fiebelkorn & Kastner (2019) proposed the existence of two  
62 alternating states that coordinate sensory and motor processes via phase opposition.  
63 That is, the phase of the theta rhythm encourages either sampling of a relevant feature  
64 (such as location) or shifting to another.

65           On a general level, attentional rhythms should also exist in other sensory  
66 modalities (e.g., the auditory modality) to similarly help in the coordination of  
67 perception and action. Mounting evidence suggests a key role of theta also for

68 auditory perception at various levels of complexity (e.g. for simple target detection (Ng  
69 et al., 2012); speech perception (Poepfel & Assaneo, 2020); auditory scene exploration  
70 (Kayser, 2019)). Albeit early studies failed to provide evidence for the existence of theta-  
71 rhythmic oscillations in auditory attention (İlhan & VanRullen, 2012; Zoefel & Heil,  
72 2013), recent findings from both cortical and behavioral data speak for their existence  
73 (Ho et al., 2017, 2019; Kayser, 2019; Kubetschek & Kayser, 2021; Ng et al., 2012; Plöchl  
74 et al., 2021). Interestingly, in bilateral pitch-identification tasks behavioral performance  
75 theta-rhythmically oscillates in antiphase between the two ears (Ho et al., 2017; Plöchl  
76 et al., 2021). These findings hint to the existence of a similar theta-dependent  
77 mechanism in auditory attention as proposed for visual attention.

78         The interpretations of the evidence for rhythmic perception in the auditory  
79 modality are largely cortico-centric. Yet, the auditory system is unique with respect to  
80 other modalities in that its neuronal architecture allows its primary sensory cortex to  
81 modulate the activity of its sensory receptors at the cochlear level. Indeed, mainly by  
82 measuring otoacoustic emissions (Dragicevic et al., 2019; Giard et al., 1994; Marcenaro  
83 et al., 2021; Wittekindt et al., 2014), it has been established that attention affects  
84 cochlear properties. Other approaches such as cochlear microphonics (Delano et al.,  
85 2007) or direct measurement of hearing nerve activity (Gehmacher et al., 2022) support  
86 this notion, which can normally only be collected in very rare circumstances in humans  
87 (e.g., individuals with cochlear implants). Despite its easy applicability, otoacoustic  
88 emissions (OAE) are restricted to sound-evoked responses, which are likely affected by  
89 confounding medial olivocochlear (MOC) activity (Guinan et al., 2003). Thus, they only  
90 provide an extremely limited view of (top-down) oscillatory dynamics at the cochlear

91 level.

92           In a previous study we introduced the measurement of ongoing otoacoustic  
93 activity (OOA) during silent cue-target intervals (Köhler et al., 2021). The measurement  
94 of OOA offers various advantages over OAEs that include the prevention of unwanted  
95 MOC activity, the possibility to analyze ongoing temporal patterns of cochlear acoustic  
96 activity, and the implementation of attention paradigms that stay very close to the  
97 cortical literature. From this, we could demonstrate the existence of a genuine cochlear  
98 theta (~6 Hz) rhythm that is modulated in amplitude but not frequency nor phase by  
99 intermodal selective attention (Köhler et al., 2021). However, the study's paradigm was  
100 not suited to assess possible attentional effects on the oscillatory phase of OOA.

101           The current study aims to shed more light on the properties of the oscillatory  
102 activity at the most peripheral stage of the auditory system. Thus far, we could  
103 demonstrate that attention modulates the overall level of cochlear activity (Köhler et  
104 al., 2021). Whether and how cochlear activity is temporally orchestrated (e.g. expressed  
105 by oscillatory phase modulations) still remains unknown. Staying close to our previous  
106 study, we implemented an interaural attention paradigm, which aimed to assess  
107 attentional phase effects on the cochlear level.

108           Replicating the findings from our previous study we found a dominant theta  
109 rhythmicity of cochlear activity. By contrast to intermodal attention (Köhler et al.,  
110 2021), interaural attention modulates the phase of OOA. Furthermore, these signals  
111 are not linked to eye movement-related putative eardrum oscillations (Gruters et al.,  
112 2018). Therefore, our results demonstrate that attentional processes can impact the

113 timing of cochlear activity. Interestingly, this phase opposition is present during  
114 anticipation of a target as well as its presentation.

## 115 **Materials & Methods**

### 116 **Participants**

117 31 healthy volunteers (21 females, age range: 18-41 years) participated in this  
118 study. After finishing the experiment, one participant reported that she was not  
119 motivated and tried to finish the experiment as fast as possible. As a result, this  
120 participant was excluded from analyses. None of the subjects reported any known  
121 hearing deficit and any visual impairment was sufficiently corrected. Moreover, all  
122 subjects were instructed to not take any ototoxic drugs and expose themselves to any  
123 loud noise 24 hours before their participation in the experiment. Subjects were  
124 informed about the experimental procedure and the purpose of the study and gave  
125 written informed consent. As compensation, subjects received either 10 euro per hour  
126 or credit for their psychology studies. This study was approved by the Ethics  
127 Committee at the University of Salzburg.

### 128 **Stimuli and Procedure**

129 The study's focus was to investigate interaural attention processes at the level of  
130 the cochlea during a silent cue-target interval. Previously, numerous studies used a  
131 block design to investigate attentional modulations of OAEs and were criticized for not  
132 achieving highly controlled attentional conditions (Carrasco et al., 2004; Köhler et al.,  
133 2021; Ward, 1997; Wittekindt et al., 2014). Therefore, we implemented a trial-wise  
134 cueing paradigm.

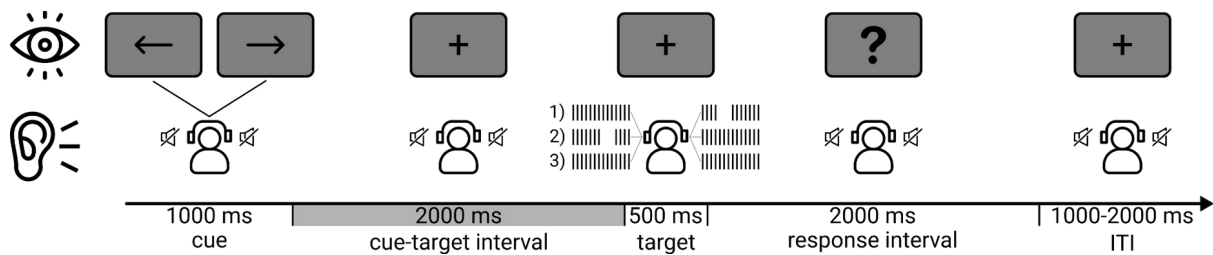

135

136 **Figure 1.** Schematic illustration of the task. Each trial started with a cue (100%  
137 informative) instructing participants to shift their attention to their left or right ear. A  
138 silent cue-target interval, in which participants focused their attention, followed.  
139 Thereafter the target was presented. The target consisted of a click train (24 Hz  
140 presentation rate) that was presented bilaterally while in 80% of the trials there was an  
141 omission of three clicks in one ear. The onset of the omission periods was jittered  
142 between the 3<sup>rd</sup> and 10<sup>th</sup> click of 14 clicks in total. Subsequently, participants indicated  
143 by a button press on the keyboard if the omission period occurred in the to-be-  
144 attended ear. The inter-trial interval was jittered uniformly between 1 and 2 s.

145

146 Measurements took place in an EEG-recording room, in which subjects sat alone  
147 and quietly in front of a PC screen (screen ratio: 16:9; width: ca. 56 degrees of visual  
148 angle; refresh rate: 120 Hz). Participants performed five blocks consisting of 100 trials  
149 each and six experimental conditions in total. The experimental conditions were  
150 defined by (1) the presented cue and (2) the congruency of the target. In the present  
151 study only two conditions are of relevance. **Figure 1** schematically illustrates the  
152 course of each trial. Each trial started with a visually presented cue (1 s duration)  
153 instructing the participants to shift their attention to their left and right ear (below  
154 referred to as Attend Left & Attend Right conditions), respectively. The direction, to  
155 which the presented arrow pointed, specified the to-be-attended ear. After cue  
156 presentation a fixation cross was shown for 2 s. During this silent cue-target interval  
157 subjects had to actively shift their attention to the indicated ear. By design the cue was  
158 100% informative. This ensured that any effects of divided attention were avoided and

159 subjects' focus was completely placed on the cued ear (Köhler et al., 2021; Wittekindt et  
160 al., 2014). The target stimulus was in all conditions a bilaterally presented click-train  
161 (duration: 500 ms; click-frequency: 24 Hz; loudness: 64 dB SPL) consisting of 14 clicks of  
162 80  $\mu$ s each. In 80 trials of each block there was an omission of three clicks in either the  
163 left or right ear. The occurrence of the omissions was counterbalanced across both  
164 ears resulting in 40 trials with an omission in the left ear and 40 trials in the right ear.  
165 Moreover, the beginning of the omissions was pseudorandomly jittered between the  
166 fourth and tenth click. The task was to identify if there was an omission in the to-be-  
167 attended ear. Next, a response screen, indicated by a centrally placed question mark,  
168 was shown for 2 s. Participants were instructed to respond as fast and correctly as  
169 possible by pressing the corresponding key of the keyboard ("N" & "M") with their index  
170 and middle finger of one hand, respectively. The used hand was counterbalanced  
171 across all subjects. The inter-trial interval was jittered uniformly between 1 and 2 s.  
172 Experimental stimulation was implemented by use of the Psychophysics Toolbox  
173 Version 3 (Brainard, 1997) and the Objective Psychophysics Toolbox (Hartmann &  
174 Weisz, 2020), which provides an intuitive, unified, and clear interface on top of the  
175 Psychophysics Toolbox, using custom-written MATLAB scripts (Version 9.8; The  
176 MathWorks, Natick, Massachusetts, USA).

## 177 **Apparatus**

### 178 *Ongoing Otoacoustic Activity*

179 For every subject OOA was measured by a probe consisting of a sensitive  
180 microphone and two loudspeakers (ER-10C microphone/preamplifier system, Etymotic  
181 Research, Elk Grove Village, Illinois, USA). After cleaning each ear canal from excessive



182 cerumen a probe was fitted with a foam ear tip that sealed the ear canal. OOA was  
183 recorded from both ears concurrently without preamplification. The microphone signal  
184 was fed into a g.USBamp Research (g.tec medical engineering GmbH, Schiedlberg,  
185 Austria) with a sampling rate of 38.4 kHz. The two ER-10C received their input via a 3.5  
186 mm audio jack to BNC cable coming from a sound preamplifier (SLA-35 stereo  
187 matching amplifier, Monacor International, Bremen, Germany), which again received  
188 its input from a computer sound card (Realtek Semiconductors Corp., Hsinchu, Taiwan).  
189 Event triggering was performed by a U3-LV (LabJack Corporation, Lakewood, Colorado,  
190 USA).

#### 191 *Electroencephalography*

192 Electroencephalography (EEG) was recorded for a separate study question.  
193 However, the data was used to address a concern linked to the relation of our OOA  
194 results to eye movements. For this purpose 28 active electrodes (g.LADYbird, g.tec  
195 medical engineering GmbH, Schiedlberg, Austria) were attached to a g.GAMMAcap  
196 (g.tec medical engineering GmbH, Schiedlberg, Austria). The electrodes were evenly  
197 distributed across the cap and placed on the following positions of the international  
198 10-10 system: Fpz, F7, F3, Fz, F4, F8, FC5, FC1, FC2, FC6, C3, Cz, C4, T7, T8, CP5, CP1,  
199 CP2, CP6, P7, P3, Pz, P4, P8, POz, O1, Oz, and O2. The reference electrode was placed  
200 on the right ear lobe and AFz was used as a ground. Impedance was kept below 5 k $\Omega$  in  
201 all subjects for the whole experiment. The signals were fed into two g.USBamp  
202 Research (g.tec medical engineering GmbH, Schiedlberg, Austria) via two  
203 g.GAMMAboxes (g.tec medical engineering GmbH, Schiedlberg, Austria) with a  
204 sampling rate of 38.4 kHz.

## 205 **Signal Processing**

### 206 *Ongoing Otoacoustic Activity*

207 We preprocessed the raw data with the open-source FieldTrip toolbox for M/EEG  
208 data (Oostenveld et al., 2011) and custom-written MATLAB scripts (Version 9.8; The  
209 MathWorks, Natick, Massachusetts, USA).

210 First, we high-pass filtered the raw signal at 500 Hz (kaiser-windowed sinc FIR  
211 filter, onepass-zero phase, order: 1114, transition width: 125 Hz) to eliminate any  
212 influence of “low-frequency” noise on otoacoustic activity. Moreover, otoacoustic  
213 activity is routinely found in a frequency range of 500 - 4000 Hz (Froehlich et al., 1993;  
214 Meric & Collet, 1992, 1994).

215 For the analysis in the cue-target interval we split the filtered data into 2 s trials  
216 that contained the signal from the cue-target intervals. We identified bad trials that  
217 contained “high-frequency” noise (e.g. caused by moving, swallowing, and coughing)  
218 by Hilbert-transforming and z-scoring the signal. We excluded a trial from further  
219 analyses of the cue-target interval if the proportion of samples that exceeded a z-score  
220 of 8 was above 1%. On average we excluded 8.16% of the trials ( $SD = 5.97\%$ ) per  
221 subject.

222 For the analysis in the omission period we split the filtered data into 125 ms  
223 trials with the signal from the omission period. We shortened the originally calculated  
224 trial length of 162.4 ms (4 x 40 ms gaps between clicks + 3 x 80  $\mu$ s clicks) by 37.4 ms to  
225 compensate for trigger inaccuracies and ringing of the click tones. There was no trial  
226 rejection as the trials were very short and noise was not problematic in the omission  
227 periods.

228           In a last step we separately extracted for the 2 s and 125 ms trials the absolute  
229 part of the Hilbert transform by applying a bandpass filter between 1500 and 2000 Hz  
230 (kaiser-windowed sinc FIR filter, onepass-zero phase, order: 372, transition width: 375  
231 Hz) as otoacoustic activity is particularly pronounced in this frequency range (Puria,  
232 2003). By means of the absolute part of the Hilbert transform the envelope of the OOA  
233 is extracted. The envelope represents amplitude fluctuations of outer hair cell (OHC)  
234 activity at frequencies of the bandpass window (Köhler et al., 2021). While raw OHC  
235 activity is found at frequencies (500 - 4000 Hz) that are significantly beyond that of  
236 cortical oscillatory activity, which is pronounced between 1 and 80 Hz, the extraction of  
237 the envelope allows analyses of cochlear modulations at frequencies that are  
238 commonly used in evaluations of cortical activity during cognitive tasks. This approach  
239 facilitates the integration of OHC modulatory activity at specific acoustic frequencies  
240 and cortical activity. All further analyses are based on the envelope of the OOA.

#### 241 *Electroencephalography*

242           We conducted preprocessing of the EEG data with the help of the NoiseTools  
243 toolbox (de Cheveigné & Arzounian, 2018), the open-source FieldTrip toolbox for  
244 M/EEG data (Oostenveld et al., 2011) and custom-written MATLAB scripts (Version 9.8;  
245 The MathWorks, Natick, Massachusetts, USA). At first, the raw data was downsampled  
246 to 3.84 kHz and channels that comprised more than 40% samples that exceeded three  
247 times the median absolute value over all data were marked as bad and excluded from  
248 further analysis. We detrended the data by removing the 10th-degree polynomial  
249 trend. In order to boost the reliability of the later calculated independent component  
250 analysis (ICA) we applied a 40 Hz low-pass filter (kaiser-windowed sinc FIR filter,

251 onepass-zero phase, order: 1392, transition width: 10 Hz) and a 0.1 Hz high-pass filter  
252 (kaiser-windowed sinc FIR filter, onepass-zero phase, order: 69542, transition width: 0.2  
253 Hz). We split the EEG data into the same trials as the OOA data and only kept trials that  
254 were marked as good for the OOA data. Next, we applied an average rereference.  
255 Lastly, we conducted an ICA and identified components that in terms of topography  
256 and time course clearly depict vertical and horizontal eye movements. These  
257 components were used to link ocular activity to OOA (see below).

## 258 **Induced Power Analysis**

259 We conducted induced power analysis only for the data from the cue-target  
260 interval. To calculate induced power spectral density (PSD) we zero-padded the  
261 envelope signal from the 2 s cue-target interval to a length of 3.4133 s. Next, we  
262 calculated a fast fourier transform with multiple tapers (“mtmfft” FieldTrip  
263 implementation) from discrete prolate spheroidal sequences (dpss) including a  
264 frequency range of 1 - 45 Hz with a bin size of 0.5 Hz and a frequency smoothing of 1  
265 Hz. As a result we obtained four PSDs - from both ears and the two experimental  
266 conditions (Attend Left & Attend Right) - per subject.

267 In a next analysis step we parameterized the individual PSDs of the OOA  
268 envelope by the usage of the FOOOF-toolbox (Donoghue et al., 2020) in Python  
269 (Version 3.8.1). The advantage of FOOOF is that it characterizes putative oscillations in  
270 neural power spectra without aperiodic contributions. The frequency range of the  
271 parameterization was set from 1 - 20 Hz. We left all parameters at their respective  
272 defaults except the value of the peak threshold, which we set to one standard deviation  
273 (SD).

## 274 **Evoked Power Analysis**

275           Besides induced power we also calculated evoked power from the omission  
276 periods. By doing so we were able to analyze the magnitude of the contralaterally  
277 evoked OAEs during stimulus presentation. We did not apply zero-padding as the  
278 frequency resolution of 8 Hz for the 125 ms interval perfectly fitted the 24 Hz  
279 stimulation rate of the click train. We calculated a fast fourier transform with multiple  
280 tapers (“mtmfft” FieldTrip implementation) from discrete prolate spheroidal sequences  
281 (dpss) including a frequency range of 0-32 Hz with a bin size of 8 Hz and a frequency  
282 smoothing of 8 Hz.

## 283 **Phase Opposition Analysis**

284           We conducted phase analysis for both the data from the cue-target intervals  
285 and omission periods. For both signals we zero-padded the trial lengths to 3.4133 s to  
286 ensure comparability between each other by obtaining the same frequency bins.  
287 Afterward, we extracted the fourier coefficients by calculating a fast fourier transform  
288 with a Hanning taper (“mtmfft” FieldTrip implementation) from 1 - 45 Hz with a bin size  
289 of 0.5 Hz and no frequency smoothing. Analogue to the power analysis we obtained  
290 four fourier spectra per subject.

291           In order to assess effects of phase differences between ears and interaural  
292 attention conditions we calculated the phase opposition sum (POS), introduced by  
293 VanRullen (2016), for all possible contrasts. The POS is a measure for the consistency of  
294 phase differences over trials and is based on the magnitude of the inter-trial coherence  
295 (ITC) over all trials and each experimental condition. **Figure 4A** schematically illustrates  
296 the rationale of this type of analysis. Phase opposition is described as the difference in

297 angles for two signals that oscillate at the same temporal frequency. At time points  
298 with a 180° phase difference it reaches its maximum. The following formula shows how  
299 the POS is calculated:

$$300 \quad POS = ITC_A + ITC_B - 2 * ITC_{all}$$

301 The POS will be positive when the summed ITC of each group is higher than two  
302 times the overall ITC.

### 303 **Phase Locking Analysis Between Eye Movements and OOA**

304 In case OOA (as operationalized in this study) was driven by eye movements,  
305 then respective signals should be strongly phase coupled.

306 We identified for every subject the ICA-component that included activity induced  
307 by eye movements and extracted the fourier coefficients the same way as described in  
308 the section above. Again, we obtained four fourier spectra per subject. To assess phase  
309 synchrony between the signal from eye movements and the signal from the left and  
310 right ear we calculated the phase locking value (PLV) during the cue-target interval  
311 (Lachaux et al., 1999). It is defined by the following formula:

$$312 \quad PLV(t) = \frac{1}{N} \left| \sum_{n=1}^N e^{i\theta(t,n)} \right|$$

313 The PLV measures the inter-trial variability of the phase difference between two  
314 signals at a given frequency. It is close to 1 if the relative phase is identical across trials  
315 and 0 if there is no phase synchrony.

## 316 **Statistical Analysis**

### 317 *Periodic Component Analysis*

318           We conducted a permutation procedure to statistically assess if the periodic  
319 components that FOOOF identified differ from a null effect of their respective spectra.  
320 For this analysis we calculated 10000 permutations of the time series of the Hilbert  
321 transform and calculated the power spectra in the same way as for the real data.  
322 Finally, we compared the distribution of the surrogate power values to the real power  
323 value. We would reject the null hypothesis that the periodic component is generic  
324 when its value was equal or above the 95<sup>th</sup>-percentile of the surrogate distribution.  
325 Statistical analysis was performed in MATLAB (Version 9.8; The MathWorks, Natick,  
326 Massachusetts, USA) with custom-written scripts.

### 327 *Induced Power Analysis*

328           First, we excluded all subjects where FOOOF failed to identify a peak in one of  
329 their four models. Secondly, we excluded all subjects that showed a bad model fit in  
330 one of their models. We classified a fit as bad when its value was at least two SDs  
331 smaller than the overall average across all models. Finally, we identified outliers in the  
332 distributions of each dependent variable by the use of Tukey's boxplot rule. In total we  
333 included 19 subjects for the statistical analysis of peak frequency and 16 subjects for  
334 peak height. After these procedures, we calculated two factorial ANOVAs (2x2) with the  
335 repeated measures factors ear (left & right) and condition (Attend Left & Attend Right)  
336 for peak frequency and height that were extracted by FOOOF. All statistical analyses  
337 were performed using the R packages "ez" (Lawrence, 2016), "DescTools" (Signorell,  
338 2021), and custom-written R scripts (Version 4.1.2; R Core Team, 2021).

339 *Evoked Power Analysis*

340 For the statistical analysis of differences in evoked power between the attention  
341 conditions at the stimulation rate of the click train we excluded outliers in the  
342 distributions of the dependent variable by the use of Tukey's boxplot rule. For the  
343 power from the left ear 27 subjects and for the right ear 25 subjects were included.  
344 Subsequently, we compared the differences by two dependent-samples t-tests, whose  
345 results were corrected for multiple comparisons using false detection rate (Benjamini &  
346 Hochberg, 1995).

347 *Phase Opposition & Phase Locking Analysis*

348 We assessed statistical significance for each subject's POS values and PLV  
349 analogously by the use of a permutation approach. We calculated 1000 surrogate POS  
350 values where for every permutation trials were pseudorandomly assigned to one of the  
351 two contrasted conditions. To calculate the 1000 surrogate PLVs the trial order of the  
352 eye movement activity was pseudorandomly permuted. In the next step we calculated  
353 the proportion of surrogate POS values / PLVs that were higher than the POS value /  
354 PLV from the original data. We set the threshold for statistical significance of the  
355 permutation p-values at 5 %. After the calculation of single subject p-values, we  
356 combined the p-values across subjects to test for the presence of a group-level effect.  
357 For this combination we used Worsely and Friston's Method where for every frequency  
358 bin the largest p-value across subjects is elevated to the power of N (Worsley & Friston,  
359 2000). This method is considered rather stringent as only the highest p-value across  
360 subjects influences the combined p-value. As a result a combined p-value below the  
361 5%-significance level implies that the p-values in every single subject are at or below  
362 that level. Following this, we used an empirical adaptation of Brown's Method to



363 combine the p-values of frequency bins (Brown, 1975; Poole et al., 2016). This  
364 adaptation uses the empirical cumulative distribution function derived from the data  
365 instead of numerical integration (Poole et al., 2016). Statistical analysis was performed  
366 in MATLAB (Version 9.8; The MathWorks, Natick, Massachusetts, USA) with off-the-shelf  
367 functions provided by VanRullen (2016), Poole et al. (2016), and custom-written scripts.

## 368 **Results**

### 369 **Behavioral Accuracy Does Not Differ Between Attention Conditions**

370 The overall performance in terms of accuracy was  $M = 73.21\%$  ( $SD = 22.50\%$ ). The  
371 accuracy for the Attend Left condition was  $M = 72.99\%$  ( $SD = 22.57\%$ ) and for the Attend  
372 Right condition  $M = 73.44\%$  ( $SD = 23.07\%$ ). There was no significant difference between  
373 both conditions ( $T_{(29)} = -0.33$ ,  $p = 0.75$ ).

### 374 **OOA Power and Frequency at Theta Rhythm Is Not Modulated by Interaural** 375 **Attention**

376 The existence of a general endogenous cochlear rhythm in the theta range has  
377 been suggested whereby the rhythm's frequency was not modulated by intermodal  
378 (visual vs. auditory) selective attention and did not differ between ears (Köhler et al.,  
379 2021). Moreover, the rhythm's amplitude was increased when attention was directed to  
380 the auditory compared to the visual modality. Hence, we asked the question if theta-  
381 rhythmic activity of the cochlea is also present during interaural attention processes.  
382 Secondly, we hypothesized that the amplitude of the cochlea's theta rhythm is  
383 enhanced in the to-be-attended ear compared to the to-be-ignored ear.

384 Analogous to previous literature we defined the silent cue-target interval as the

385 period in which interaural attention processes occur (Köhler et al., 2021; Wittekindt et  
386 al., 2014). In this interval we parameterized induced cochlear oscillatory power by the  
387 usage of FOOOF (for details see the METHODS section). FOOOF could identify a peak in  
388 all but six power spectra. The average peak frequency in the left ear for the Attend Left  
389 condition was at  $M = 4.96$  Hz ( $SD = 2.89$  Hz) and in the Attend Right condition at  $M =$   
390  $5.34$  Hz ( $SD = 3.50$  Hz). In the right ear the average peak frequency in the Attend Left  
391 condition was at  $M = 5.98$  Hz ( $SD = 3.40$  Hz) and in the Attend Right condition at  $M =$   
392  $4.33$  Hz ( $SD = 3.08$  Hz). By means of a permutation procedure we tested if the peaks  
393 that were identified by FOOOF significantly differed from a null effect. Indeed, for all  
394 subjects every identified peak was significantly different from being a generic  
395 component. These results replicate the findings from previous studies (Dragicevic et  
396 al., 2019; Köhler et al., 2021) and contribute further evidence for the existence of a  
397 genuine cochlear theta rhythm.

398         Next, we tested if the frequencies in each condition and ear are significantly  
399 different. The result of a two factorial ANOVA (2x2) with the repeated measures factors  
400 ear (left & right) and attention condition (Attend Left & Attend Right) revealed no  
401 significant main effects (ear:  $F_{(1, 18)} = 5.08e-05$ ,  $p = 0.99$ ; condition:  $F_{(1, 18)} = 0.78$ ,  $p = 0.39$ ).  
402 Regarding the interaction, **Figure 2A** suggests a deceleration of the cochlear's theta  
403 rhythm for the to-be-attended and acceleration for the to-be-ignored ear. However, the  
404 effect was only significant on a trend level ( $F_{(1, 18)} = 3.93$ ,  $p = 0.06$ ).

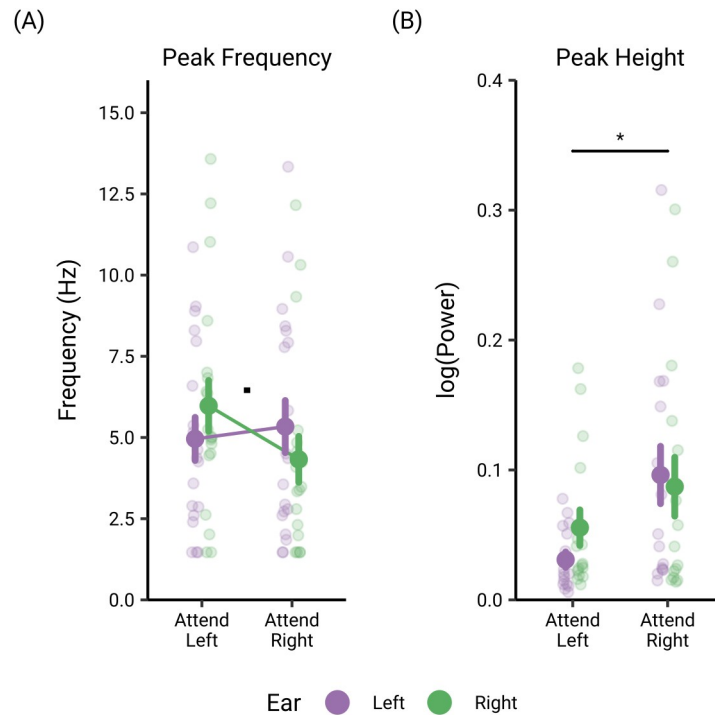

405

406 **Figure 2.** Peak analysis of OOA by FOOOF. (A) Results of a two factorial ANOVA (2x2)  
407 with the repeated measures factors ear (left & right) and attention condition (Attend  
408 Left & Attend Right) for peak frequency. On average theta rhythmicity for the OOA is  
409 revealed. The dot depicts the trend-level effect of the ordinal interaction. (B) Results of  
410 a two factorial ANOVA (2x2) with the repeated measures factors ear (left & right) and  
411 attention condition (Attend Left & Attend Right) for peak height of the peaks shown in  
412 (A).

413 The asterisk depicts the (on the 5%-level) significant main effect of attention condition.  
414 The big colored dots and error bars represent the mean and SEM.

415

416 Another aim of this study was to follow up on the relative increase of spectral  
417 power at frequencies of the cochlea's theta rhythm when attention was shifted to the  
418 auditory modality as shown in Köhler et al. (2021). These findings depict a cochlear  
419 mechanism of selective attentional enhancement of the to-be-attended and  
420 deterioration of the to-be-ignored external stimulation for intermodal attention.  
421 Accordingly, we hypothesized in the context of interaural attention that the power at

422 individual peak frequencies is increased in the to-be-attended compared to the to-be-  
423 ignored ear.

424 In addition to peak frequency, FOOOF reports the relative logarithmic power  
425 (peak height) above the aperiodic component for each identified peak. The average  
426 peak height in the left ear for the Attend Left condition was at  $M = 0.0309$  ( $SD = 0.0237$ )  
427 and in the Attend Right condition at  $M = 0.0961$  ( $SD = 0.0883$ ). In the right ear the  
428 average peak height in the Attend Left condition was at  $M = 0.0556$  ( $SD = 0.0547$ ) and in  
429 the Attend Right condition at  $M = 0.0871$  ( $SD = 0.0906$ ). The result of a two factorial  
430 ANOVA (2x2) with the repeated measures factors ear (left & right) and attention  
431 condition (Attend Left & Attend Right) revealed no significant main effect for ear but,  
432 there was a significant main effect for attention condition (ear:  $F_{(1, 15)} = 0.29$ ,  $p = 0.60$ ;  
433 condition:  $F_{(1, 15)} = 6.95$ ,  $p = 0.02$ ). The interaction effect was not significant ( $F_{(1, 15)} = 1.34$ ,  
434  $p = 0.26$ ). **Figure 2B** depicts the main effect of condition for peak height. The general  
435 increase in OOA peak power for the Attend Right condition in both ears could be  
436 explained by a general processing advantage for attention directed to the right side.

### 437 **Evoked Power at Stimulation Frequency Is Modulated by Interaural Attention**

438 Subsequently, we tested if there are differences of the contralaterally evoked  
439 otoacoustic activity between attention conditions. For that, we separately calculated  
440 the evoked power of the envelope at the stimulation frequency during the omission  
441 periods for Attend Left and Attend Right trials. Two FDR-corrected dependent samples  
442 t-tests for each ear separately revealed a significant difference for the right ear (left  
443 ear:  $T_{26} = -1.07$ ,  $p = 0.29$ ; right ear:  $T_{24} = -2.80$ ,  $p = 0.02$ ). **Figure 3** illustrates the results of  
444 both t-tests. **Figure 3B** demonstrates that in the right ear the power for the Attend Left

445 condition ( $M = 0.0113$ ,  $SD = 0.0079$ ) is higher than for the Attend Right condition ( $M =$   
446  $0.0075$ ,  $SD = 0.0050$ ).

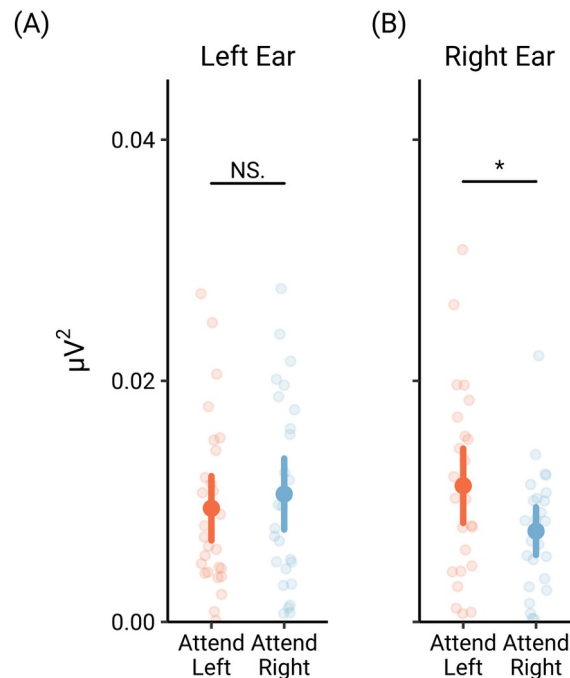

447

448 **Figure 3.** Evoked power at stimulation frequency (24 Hz) during omission periods. (A)  
449 Power of the two attention conditions for the left ear. (B) Power of the two attention  
450 conditions for the right ear.

451 All p-values are FDR-corrected. The asterisk depicts significance on the 5%-level. The  
452 big colored dots and error bars represent the mean and SEM.

453

### 454 **OOA Oscillates in Antiphase Between Ears and Attention Conditions**

455 Besides attentional modulations in the power domain, we expected effects of

456 interaural attention in the phase domain. In the cortical attention literature it is well

457 established that the phases of neural oscillations affect how external stimuli are

458 processed (e.g. stimuli arriving at the peak of a neural oscillation are in favor of further

459 cortical processing than stimuli arriving at the trough). Attentional processes have the

460 ability to alter or shift the phases of neural oscillations to favor some predicted to-be-

461 attended stimuli over to-be-ignored stimuli. While power of cortical activity has been  
462 classically interpreted to indicate the level of excitation and inhibition, phase shifts  
463 reflect the timing regulation of excitability. Here, we aimed to investigate if phase shifts  
464 of the OOA represent an analogous mechanism already at the level of the cochlea. We  
465 hypothesized that the phase during the cue-target interval in the same attention  
466 condition is different between the two ears (ear contrasts). Moreover, we speculated  
467 that the phase in the same ear is different between both attention conditions  
468 (attention contrasts).

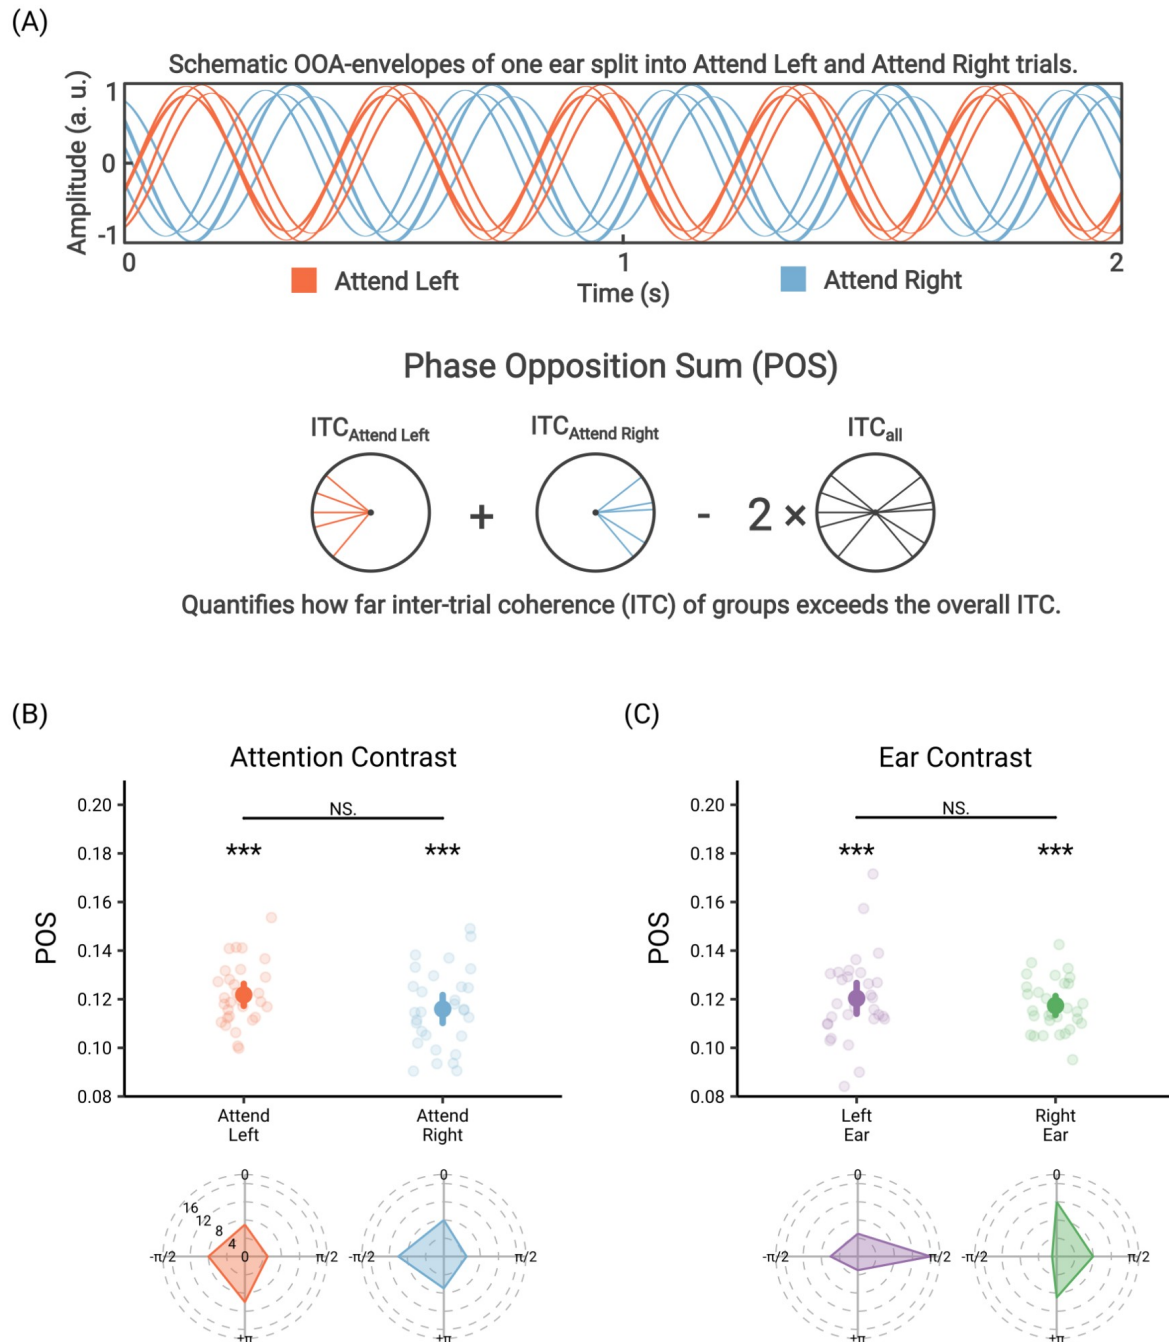

469

470 **Figure 4.** Rationale of phase analysis and cochlear phase effects during the silent cue-  
 471 target interval. (A) In the upper panel schematic OOA envelopes of one ear are  
 472 illustrated. The envelopes are separately split into trials for the Attend Left and Attend  
 473 Right condition. For illustration purposes the envelopes of both conditions oscillate  
 474 almost at perfect antiphase. The consistency of the phase opposition between the  
 475 Attend Left and Attend Right trials is calculated by the Phase Opposition Sum, whose  
 476 formula is depicted in the lower panel. (B) POS for the ear contrasts. The POS between  
 477 the left and right ear for all Attend Left trials is depicted in red and for all Attend Right  
 478 trials in blue. The POS effects significantly differed from a null effect revealed by a

479 permutation procedure. There was no difference between attention conditions. In the  
480 lower row the histograms for the relative phase differences are illustrated. The  
481 histograms are equally binned in four segments and frequencies are plotted at the  
482 lower bound of each bin. The phase of the left ear was normalized to 0. (C) POS for the  
483 attention contrasts. The POS between the Attend Left and Attend Right trials for the left  
484 ear is depicted in purple and for the right ear in green. The POS effects significantly  
485 differed from a null effect revealed by a permutation procedure. There was no  
486 difference between the ears. In the lower row the histograms for the relative phase  
487 differences are shown. The histograms are equally binned in four segments and  
488 frequencies are plotted at the lower bound of each bin. The phase of the Attend Left  
489 trials was normalized to 0.

490 The big dots and error bars represent the mean and SEM. The three asterisks illustrate  
491 significance on the 0.001%-significance level.

492

493 We analyzed phase differences by calculating the POS for every contrast of  
494 interest. The POS is a measure to calculate the consistency of phase opposition  
495 between two signals. **Figure 4A** illustrates the rationale of this analysis.

496 For testing the first hypothesis (ear contrasts) we selected all Attend Left trials  
497 and contrasted the signal from the left with the right ear. After that we did the same  
498 for all Attend Right trials. Altogether, we compared the phases of the to-be-attended  
499 ear with the to-be-ignored ear in both conditions. As we were interested in phase  
500 differences at frequencies of the cochlear rhythm, we averaged the POS values  
501 between 1.56 and 9.82 Hz. The limits for this frequency range were defined by  $\pm 1$  SD of  
502 the mean peak frequency from all peaks that were previously identified. While  
503 attention was shifted to the left side the POS between the two ears was  $M = 0.122$  ( $SD =$   
504  $0.013$ ,  $p = 5.76e-13$ ) and while it was shifted to the right side it was  $M = 0.116$  ( $SD =$   
505  $0.016$ ,  $p = 1.1e-08$ ). There was no significant difference between both contrasts ( $T_{(29)} =$



506 1.57,  $p = 0.13$ ). **Figure 4B** shows the reported effects of the POS for the ear contrasts.  
507 The two panels in the lower row illustrate the histograms of the relative phase  
508 differences for the Attend Left and Attend Right trials while the phase of the left ear  
509 was normalized to 0. The histograms are equally binned in four segments and  
510 frequencies are plotted at the lower bound of each bin.

511 Next, we tested the second hypothesis (attention contrasts) by applying the  
512 same approach as for the first one with only one difference. We contrasted for the left  
513 ear the signal from Attend Left trials with the signal from Attend Right trials. After that  
514 we did the same for the right ear. We then compared the phases of one ear while it  
515 was to-be-attended and while it was to-be-ignored. In the left ear the overall POS  
516 between the both attention conditions was  $M = 0.120$  ( $SD = 0.018$ ,  $p = 9.19e-10$ ) and  $M =$   
517  $0.117$  ( $SD = 0.011$ ,  $p = 3.09e-11$ ) in the right ear. There was no significant difference  
518 between both contrasts ( $T_{(29)} = 0.76$ ,  $p = 0.45$ ). **Figure 4C** visualizes the effects of the  
519 POS for the attention contrasts.

520 In order to provide additional evidence that phases are modulated by interaural  
521 attention we employed the same analysis approach to the phases from the omission  
522 periods of the click trains. In this way, we were able to assess phase differences of the  
523 cochlear rhythm during the presentation of the target. The POS for the ear contrasts  
524 was  $M = 0.223$  ( $SD = 0.155$ ,  $p = 0.006$ ) for Attend Left trials and  $M = 0.222$  ( $SD = 0.159$ ,  $p =$   
525  $0.010$ ) for Attend Right trials (See **Figure 5A**). The POS for the attention condition  
526 contrasts was  $M = 0.203$  ( $SD = 0.185$ ,  $p = 0.026$ ) in the left ear and  $M = 0.242$  ( $SD = 0.192$ ,  
527  $p = 0.011$ ) in the right ear (See **Figure 5B**). This analysis indicates that there is phase  
528 opposition during task execution for both the attention condition and the ear

529 contrasts. Hereby, these results corroborate that the phase opposition effects during  
 530 the cue-target interval were induced by top-down attentional processes.

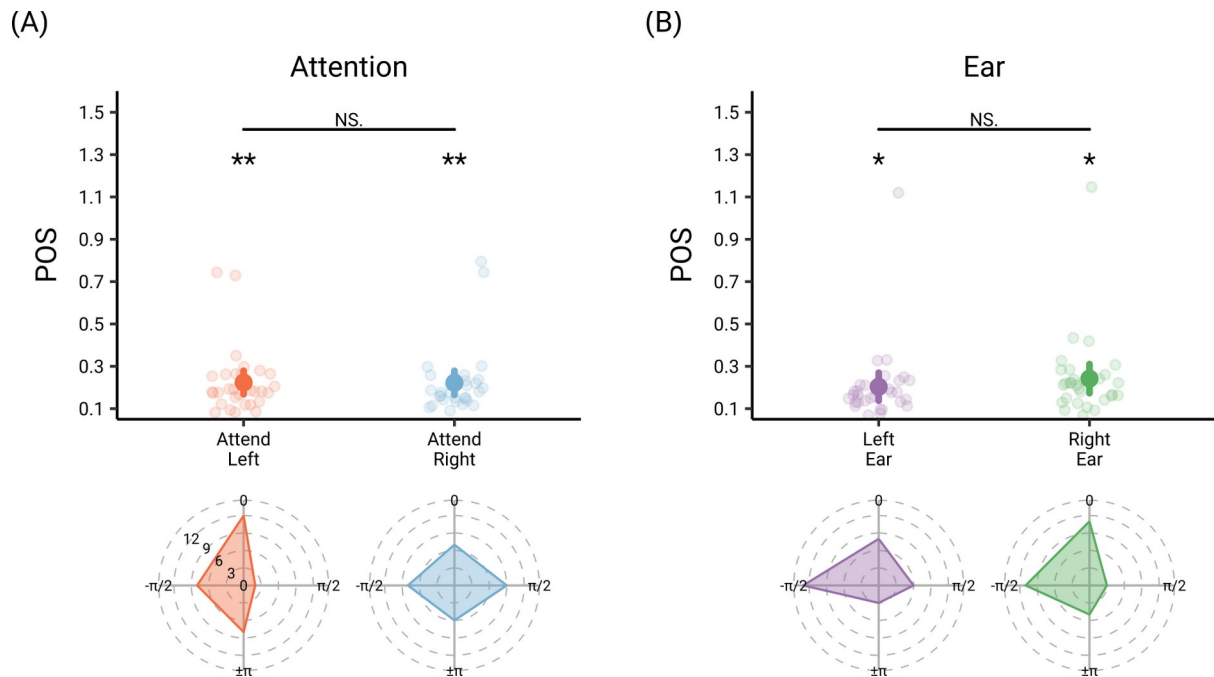

531

532 **Figure 5.** Cochlear phase effects during the omission periods. (A) POS for the ear  
 533 contrasts. The POS between the left and right ear for all Attend Left trials is depicted in  
 534 red and for all Attend Right trials in blue. The POS effects significantly differed from a  
 535 null effect revealed by a permutation procedure. There was no difference between  
 536 attention conditions. In the lower row the histograms for the relative phase differences  
 537 are illustrated. The histograms are equally binned in four segments and frequencies  
 538 are plotted at the lower bound of each bin. The phase of the left ear was normalized to  
 539 0. (B) POS for the attention contrasts. The POS between the Attend Left and Attend  
 540 Right trials for the left ear is depicted in purple and for the right ear in green. The POS  
 541 effects significantly differed from a null effect revealed by a permutation procedure.  
 542 There was no difference between the ears. In the lower row the histograms for the  
 543 relative phase differences are shown. The histograms are equally binned in four  
 544 segments and frequencies are plotted at the lower bound of each bin. The phase of the  
 545 Attend Left trials was normalized to 0.

546 The big dots and error bars represent the mean and SEM. One asterisk illustrates  
 547 significance on the 0.05%-significance level and two asterisks on the 0.01%-level.

548

549 All in all, the reported results show that the phase of the oscillatory activity at

550 the level of the auditory periphery is modulated by attention processes. Importantly,  
551 the results of the attention contrasts provide conclusive evidence that supports this  
552 notion. While phase opposition between both ears could be an adaptation to (cochlear)  
553 physiological processes, phase opposition in one ear between both attention  
554 conditions allows one to draw the conclusion that attention modulates the phase of  
555 OOA.

### 556 **OOA Is Not Phase Locked to Eye Movements**

557 Gruters et al. (2018) demonstrated that the eardrums oscillate in relation to  
558 horizontal eye movements. These so-called eye movement-related eardrum oscillations  
559 (EMREOs) occur predominantly between 20 - 40 Hz of the acoustic spectrum measured  
560 from the ear canals. Our reported effects of phase opposition are at much higher  
561 acoustic frequencies (1500 - 2000 Hz). However, via phase-amplitude coupling the  
562 envelopes at high frequencies could still be confounded by low frequency eye  
563 movement-related acoustic activity during the cue-target interval. If this was the case,  
564 then a clear phase coupling between OOA and eye movements would be predicted. In  
565 order to test this possibility we calculated the PLV between the eye movements (ocular  
566 components from EEG data) and the acoustic envelope from both ears at the same  
567 frequencies as was used for the POS analysis.

568 In three subjects no eye movement-related ICA component could be identified  
569 as these subjects did not show marked eye movements in the EEG-data during the cue-  
570 target period. The PLV in the left ear when attention was directed to the left side was  $M$   
571 = 0.058 ( $SD = 0.004$ ,  $p = 0.289$ ) and in the right ear  $M = 0.057$  ( $SD = 0.004$ ,  $p = 0.852$ ). The  
572 PLV in the left ear when attention was directed to the right side was  $M = 0.061$  ( $SD =$

573 0.006,  $p = 0.197$ ) and in the right ear  $M = 0.057$  ( $SD = 0.007$ ,  $p = 0.573$ ).

574 We failed to show significant phase locking to eye movements in the left and  
575 right ear for both attention conditions. Thus, the ocular process that underlies the  
576 previously reported EMREOs (Gruters et al., 2018) is only a very weak candidate  
577 explanation for our attentional OOA effects.

## 578 **Discussion**

579 Previous research on top-down modulations of the phase of auditory perception  
580 was focused on cortical and behavioral effects but neglected the cochlea, which is the  
581 most peripheral part of the auditory system and innervated by efferent connections  
582 arising from the primary auditory cortex. In our previous study we reported a  
583 putatively endogenous theta-rhythmic pattern of otoacoustic activity (Köhler et al.,  
584 2021). While low frequency power of oscillatory cochlear activity was modulated by top-  
585 down intermodal attention its frequency and phase was independent of it. As the  
586 paradigm of the previous study was not suitable for assessing top-down modulations  
587 of phase, we implemented an interaural attention paradigm that allowed us to draw  
588 conclusions on how the phases of the cochlea's theta rhythm in both ears are  
589 modulated by attention processes. We show that interaural attention consistently  
590 modulates the phases in both ears. In the past, such effects were only reported for  
591 cortical signals and behavioral performance. To the best of our knowledge this is the  
592 first time that phase modulations of the auditory receptor are reported.

### 593 **Cochlear Acoustic Activity Is Theta-rhythmically Modulated**

594 Our analysis of the OOA during the cue-target interval replicated the findings

595 from our previous study, namely the existence of a theta-rhythmic (~5 Hz on average)  
596 modulation of the cochlea's otoacoustic activity (Köhler et al., 2021). Thereby, aperiodic  
597 ("1/f") contributions to this effect were ruled out. This finding is in line with the results  
598 from a study that investigated oscillations of behavioral performance in a bilateral  
599 pitch-identification task (Ho et al., 2017). The authors reported an oscillation of  
600 behavioral performance in the theta (~6 Hz) and low alpha (~8 Hz) range. In addition, a  
601 second study that adapted the experimental paradigm from Ho et al. (Ho et al., 2017)  
602 could also report a theta-rhythmic modulation of auditory behavioral performance  
603 (Plöchl et al., 2021). Considering the anatomical structure of the efferent auditory  
604 system (Terreros & Delano, 2015), cochlear rhythmicities could be modulated by  
605 cortical (attention) processes or be adaptations to physiological processes of the  
606 auditory receptor.

### 607 **Cochlear Acoustic Activity Oscillates in Antiphase Between Ears and Direction of** 608 **Attention Within an Ear**

609         The temporal pattern of the cochlear rhythmic activity during the cue-target  
610 interval displayed significant phase opposition at frequencies encompassing the theta-  
611 band. This phenomenon was not only present between the to-be-attended and to-be-  
612 ignored ear but also in the same ear between both attention conditions. These results  
613 are very similar to that observed in the visual and recently emerging auditory rhythmic  
614 sampling literature for both neural activity and behavioral performance, expanding it  
615 to the level of the auditory receptor (Fiebelkorn et al., 2013; Ho et al., 2017; Kayser,  
616 2019; Kubetschek & Kayser, 2021; Landau & Fries, 2012; Plöchl et al., 2021; Spyropoulos  
617 et al., 2018). Moreover, on the basis of the PLV analysis it seems very unlikely that these

618 effects are driven by eye movement-related activity.

619 For visual attention it is established that simultaneously presented objects are  
620 sampled in sequence at ~4 Hz (Fiebelkorn et al., 2013, 2018; Helfrich et al., 2018;  
621 Landau et al., 2015; Landau & Fries, 2012). For the auditory modality studies reported  
622 conflicting results of such effects (Ho et al., 2017; İlhan & VanRullen, 2012; Ng et al.,  
623 2012; Plöchl et al., 2021; Zoefel & Heil, 2013). Either effects were absent (İlhan &  
624 VanRullen, 2012), at least partly dependent on the power and phase of ongoing neural  
625 theta oscillations (Ng et al., 2012), or attributed to artifacts (Zoefel & Heil, 2013).  
626 Regardless, recent studies were consistently able to demonstrate rhythmic  
627 modulations of behavioral detection performance (Ho et al., 2017, 2019; Kayser, 2019;  
628 Plöchl et al., 2021). For instance, Ho et al. (2017), who applied signal detection theory to  
629 test for oscillations of behavioral performance in a bilateral pitch-identification task,  
630 demonstrated that both criterion and sensitivity oscillate in antiphase between the left  
631 and right ear. These findings are in line with the phase opposition of OOA between the  
632 to-be-attended and to-be-ignored ear reported here. However, such an effect does not  
633 rule out the possibility that both ears endogenously sample auditory input in  
634 antiphase. Certainly, OOA also demonstrates phase opposition between both attention  
635 conditions in the same ear. This phenomenon provides evidence that the auditory  
636 streams from both ears are not endogenously sampled in antiphase but interaural  
637 attention systematically modulates the temporal dynamics of auditory sampling.  
638 Together, both effects corroborate the existence of alternating attentional states  
639 directly affecting cochlear processes.

640 **Interaural Attention Modulates the Timing of Excitation & Inhibition of Cochlear**  
641 **Activity**

642 In Köhler et al. (2021) we reported the existence of a systematic variation of  
643 OOA level but not phase for intermodal attention. Interestingly, in the current study  
644 interaural attention systematically modulates the phase of OOA but against our  
645 hypothesis not its level. Thus, it seems that both types of attention impact cochlear  
646 activity in a differential manner. While intermodal attention modulates the level of  
647 cochlear activity, interaural attention modulates the timing. In situations where the  
648 former is of relevance the overall auditory input is either distracting and should be  
649 ignored or relevant and processing should be facilitated. A mechanism affecting the  
650 level of amplification of auditory input at the level of the cochlea seems to fit this aim.  
651 Conversely, in situations where interaural attention is of relevance we initially  
652 hypothesized that it deploys additionally to cochlear level differences between ears  
653 also differences in the temporal organization of the auditory input from both ears. Our  
654 current results revealed that interaural attention relies only on a mechanism affecting  
655 the timing of cochlear activity. In this regard, on the cochlear level intermodal attention  
656 seems to manifest via level differences of cochlear activity and interaural attention via  
657 its temporal orchestration.

658 So far, there is only one study that systematically investigated effects of  
659 interaural attention on the acoustic activity of the outer hair cells. Srinivasan et al.  
660 (2014) recorded distortion product otoacoustic emissions (DPOAE) while participants  
661 had to identify brief tones in the ipsi- or contralateral ear or brief phase shifts of a  
662 visual grating. Interestingly, DPOAE levels were smallest when attention was shifted to  
663 the ipsilateral ear, where DPOAEs were recorded from, and highest for visual attention.

664 These results stand in contrast to widely accepted effects observed by  
665 electrophysiological measures of peripheral auditory function (Delano et al., 2007;  
666 Lukas, 1980), otoacoustic (Dragicevic et al., 2019; Köhler et al., 2021; Wittekindt et al.,  
667 2014), and cortical measures (Johnson & Zatorre, 2005; Kauramäki et al., 2007; Woldorff  
668 et al., 1987). However, the authors explain their found effect by the fact that  
669 participants were instructed to focus the DPOAE primary tones, which are some  
670 cochlear distance apart, and by the tonotopic tuning of the MOC the response of the  
671 DPOAE could be suppressed.

672 In the current study the OOA did not display a systematic variation in peak  
673 height but phase between ears and attention conditions. In line with our results there  
674 is evidence from studies on dichotic listening while recording physiological noise from  
675 the ear canal that there is no difference in noise level between the ipsi- and  
676 contralateral ear (Walsh et al., 2014, 2015). These results speak for interaural attention  
677 manifesting via the timing aspect of cochlear activity. In contrast to the current study,  
678 the paradigm of Srinivasan et al. (2014) did not exclusively assess interaural attention  
679 but also intermodal attention. That is, participants shifting their attention to one ear  
680 consistently had to not only ignore auditory input from the other ear but also visual  
681 input. However, their results support our proposition that intermodal attention  
682 manifests via level differences of otoacoustic activity.

### 683 **The Input from Both Ears Is Perceived as Two Independent Objects Rather than** 684 **One Object with Two Locations**

685 Lately one study suggests that visual and auditory oscillations share a general  
686 attentional mechanism, which theta-rhythmically samples target locations and objects,



687 respectively (Plöchl et al., 2021). Thereby, supramodal attentional sampling switches  
688 between two objects at a rate of ~ 4 Hz and between two target locations within a  
689 single object at ~8 Hz. Interestingly, Plöchl et al. (2021) found a significant phase  
690 opposition only at ~8 Hz for auditory detection performance. The authors attributed  
691 that to the fact that auditory input from both ears may not consistently be perceived as  
692 two independent objects but rather as a single object containing two target locations.  
693 Also the from Ho et al. (2017) reported effects of behavioral oscillations pointing more  
694 towards ~8 Hz than ~4 Hz seem to support this assumption. In contrast, our results of  
695 cochlear oscillations at ~5 Hz speak more for the perception of two auditory streams as  
696 two independent objects. However, the question to what extent such oscillatory effects  
697 of behavior are represented on a cochlear level is a matter for future research.

### 698 **Aspects for Future Studies**

699         The rhythmic modulation in our previous study was not affected in frequency by  
700 intermodal (auditory/visual) attentional processes. Hence, we argued for a general  
701 endogenous cochlear rhythm. However, the trend-level effect of frequency reported  
702 here could point to a systematic modulation of the frequency of the cochlear rhythmic  
703 activity by interaural attention processes. More precisely, a reduced frequency for the  
704 to-be-attended compared to the to-be-ignored ear. This phenomenon could be  
705 interpreted in line with the active sampling literature proposing two theta-dependent  
706 states of attention that either facilitate sampling of an object/location or the likelihood  
707 of a shift to another object/location (Fiebelkorn & Kastner, 2019). In the current study  
708 there were two locations as auditory stimulation was fully lateralized to the left and  
709 right ear. Therefore, for active listeners occasional shifting to the to-be-ignored ear

710 would have likely happened. An increase in frequency for the to-be-ignored ear would  
711 lead to a reduction in time required to occasionally sample this ear. Again, it has to be  
712 noted that this effect did just fail to reach statistical significance. Nevertheless, it would  
713 be interesting for future studies to address the existence of this phenomenon.

## 714 **Conclusion**

715 Here we demonstrate that the phase of cochlear theta-rhythmic activity is  
716 systematically modulated by interaural attention. In doing so, the present results  
717 suggest that cueing events can orchestrate endogenous cochlear oscillations to  
718 putatively affect processing of upcoming stimuli. In addition, this study not only adds  
719 to a growing body of literature providing evidence that attentional sampling is not  
720 restricted to the visual modality but also extends this mechanism to the most  
721 peripheral stage of the auditory efferent system. In the context of the corticofugal  
722 pathways we provide an additional link between the primary auditory cortex and  
723 behavior. Yet, at this point it remains an open question if (1) perceptual and attentional  
724 rhythmicities are genuinely driven by cortical effects or are an adaptation to  
725 physiological properties of the cochlea, (2) oscillatory effects of behavior are reflected  
726 on a cochlear level. Future studies should investigate the relationship between  
727 cochlear, (auditory) cortical, and behavioral oscillations. Moreover, it would be  
728 interesting to study the mechanistic properties of this rhythm in hearing impaired  
729 individuals.

## 730 **References**

731 Benjamini, Y., & Hochberg, Y. (1995). Controlling the False Discovery Rate: A Practical

- 732 and Powerful Approach to Multiple Testing. *Journal of the Royal Statistical Society:*  
733 *Series B (Methodological)*, 57(1), 289–300. <https://doi.org/10.1111/j.2517->  
734 [6161.1995.tb02031.x](https://doi.org/10.1111/j.2517-6161.1995.tb02031.x)
- 735 Brainard, D. H. (1997). The Psychophysics Toolbox. *Spatial Vision*, 10(4), 433–436.  
736 <https://doi.org/10.1163/156856897X00357>
- 737 Brown, M. B. (1975). 400: A Method for Combining Non-Independent, One-Sided Tests  
738 of Significance. *Biometrics*, 31(4), 987–992. <https://doi.org/10.2307/2529826>
- 739 Busch, N. A., & VanRullen, R. (2010). Spontaneous EEG oscillations reveal periodic  
740 sampling of visual attention. *Proceedings of the National Academy of Sciences*,  
741 107(37), 16048–16053. <https://doi.org/10/d86cdf>
- 742 Carrasco, M., Ling, S., & Read, S. (2004). Attention alters appearance. *Nature*  
743 *Neuroscience*, 7(3), 308–313. <https://doi.org/10.1038/nn1194>
- 744 de Cheveigné, A., & Arzounian, D. (2018). Robust detrending, rereferencing, outlier  
745 detection, and inpainting for multichannel data. *NeuroImage*, 172, 903–912.  
746 <https://doi.org/10.1016/j.neuroimage.2018.01.035>
- 747 Delano, P. H., Elgueda, D., Hamame, C. M., & Robles, L. (2007). Selective Attention to  
748 Visual Stimuli Reduces Cochlear Sensitivity in Chinchillas. *Journal of Neuroscience*,  
749 27(15), 4146–4153. <https://doi.org/10.1523/JNEUROSCI.3702-06.2007>
- 750 Donoghue, T., Haller, M., Peterson, E. J., Varma, P., Sebastian, P., Gao, R., Noto, T., Lara,  
751 A. H., Wallis, J. D., Knight, R. T., Shestyuk, A., & Voytek, B. (2020). Parameterizing  
752 neural power spectra into periodic and aperiodic components. *Nature*  
753 *Neuroscience*, 23(12), 1655–1665. <https://doi.org/10.1038/s41593-020-00744-x>
- 754 Dragicevic, C. D., Marcenaro, B., Navarrete, M., Robles, L., & Delano, P. H. (2019).

- 755 Oscillatory infrasonic modulation of the cochlear amplifier by selective  
756 attention. *PLOS ONE*, 14(1), e0208939. <https://doi.org/10/gf2zb7>
- 757 Fiebelkorn, I. C., & Kastner, S. (2019). A Rhythmic Theory of Attention. *Trends in*  
758 *Cognitive Sciences*, 23(2), 87–101. <https://doi.org/10/gfsh5k>
- 759 Fiebelkorn, I. C., Pinsk, M. A., & Kastner, S. (2018). A Dynamic Interplay within the  
760 Frontoparietal Network Underlies Rhythmic Spatial Attention. *Neuron*, 99(4), 842-  
761 853.e8. <https://doi.org/10.1016/j.neuron.2018.07.038>
- 762 Fiebelkorn, I. C., Saalman, Y. B., & Kastner, S. (2013). Rhythmic Sampling within and  
763 between Objects despite Sustained Attention at a Cued Location. *Current*  
764 *Biology*, 23(24), 2553–2558. <https://doi.org/10.1016/j.cub.2013.10.063>
- 765 Froehlich, P., Collet, L., & Morgon, A. (1993). Transiently evoked otoacoustic emission  
766 amplitudes change with changes of directed attention. *Physiology and Behavior*,  
767 53(4), 679–682. [https://doi.org/10.1016/0031-9384\(93\)90173-D](https://doi.org/10.1016/0031-9384(93)90173-D)
- 768 Gehmacher, Q., Reisinger, P., Hartmann, T., Keintzel, T., Rösch, S., Schwarz, K., & Weisz,  
769 N. (2022). Direct cochlear recordings in humans show a theta rhythmic  
770 modulation of auditory nerve activity by selective attention. *Journal of*  
771 *Neuroscience*. <https://doi.org/10.1523/JNEUROSCI.0665-21.2021>
- 772 Giard, M. H., Collet, L., Bouchet, P., & Pernier, J. (1994). Auditory selective attention in  
773 the human cochlea. *Brain Research*, 633(1–2), 353–356.  
774 [https://doi.org/10.1016/0006-8993\(94\)91561-X](https://doi.org/10.1016/0006-8993(94)91561-X)
- 775 Gruters, K. G., Murphy, D. L. K., Jenson, C. D., Smith, D. W., Shera, C. A., & Groh, J. M.  
776 (2018). The eardrums move when the eyes move: A multisensory effect on the  
777 mechanics of hearing. *Proceedings of the National Academy of Sciences*,

- 778           201717948. <https://doi.org/10.1073/pnas.1717948115>
- 779   Guinan, J. J., Backus, B. C., Lilaonitkul, W., & Aharonson, V. (2003). Medial Olivocochlear  
780           Efferent Reflex in Humans: Otoacoustic Emission (OAE) Measurement Issues  
781           and the Advantages of Stimulus Frequency OAEs. *JARO - Journal of the Association*  
782           *for Research in Otolaryngology*, 4(4), 521–540. [https://doi.org/10.1007/s10162-](https://doi.org/10.1007/s10162-002-3037-3)  
783           002-3037-3
- 784   Hartmann, T., & Weisz, N. (2020). An Introduction to the Objective Psychophysics  
785           Toolbox. *Frontiers in Psychology*, 11. <https://doi.org/10.3389/fpsyg.2020.585437>
- 786   Helfrich, R. F., Fiebelkorn, I. C., Szczepanski, S. M., Lin, J. J., Parvizi, J., Knight, R. T., &  
787           Kastner, S. (2018). Neural Mechanisms of Sustained Attention Are Rhythmic.  
788           *Neuron*, 99(4), 854-865.e5. <https://doi.org/10.1016/j.neuron.2018.07.032>
- 789   Ho, H. T., Burr, D. C., Alais, D., & Morrone, M. C. (2019). Auditory Perceptual History Is  
790           Propagated through Alpha Oscillations. *Current Biology*, 29(24), 4208-4217.e3.  
791           <https://doi.org/10.1016/j.cub.2019.10.041>
- 792   Ho, H. T., Leung, J., Burr, D. C., Alais, D., & Morrone, M. C. (2017). Auditory Sensitivity  
793           and Decision Criteria Oscillate at Different Frequencies Separately for the Two  
794           Ears. *Current Biology*, 27(23), 3643-3649.e3.  
795           <https://doi.org/10.1016/j.cub.2017.10.017>
- 796   İlhan, B., & VanRullen, R. (2012). No Counterpart of Visual Perceptual Echoes in the  
797           Auditory System. *PLOS ONE*, 7(11), e49287.  
798           <https://doi.org/10.1371/journal.pone.0049287>
- 799   Johnson, J. A., & Zatorre, R. J. (2005). Attention to Simultaneous Unrelated Auditory and  
800           Visual Events: Behavioral and Neural Correlates. *Cerebral Cortex*, 15(10), 1609–

- 801 1620. <https://doi.org/10.1093/cercor/bhi039>
- 802 Kauramäki, J., Jääskeläinen, I. P., & Sams, M. (2007). Selective Attention Increases Both  
803 Gain and Feature Selectivity of the Human Auditory Cortex. *PLOS ONE*, 2(9), e909.  
804 <https://doi.org/10.1371/journal.pone.0000909>
- 805 Kayser, C. (2019). Evidence for the Rhythmic Perceptual Sampling of Auditory Scenes.  
806 *Frontiers in Human Neuroscience*, 13, 249.  
807 <https://doi.org/10.3389/fnhum.2019.00249>
- 808 Kayser, C., Wilson, C., Safaai, H., Sakata, S., & Panzeri, S. (2015). Rhythmic Auditory  
809 Cortex Activity at Multiple Timescales Shapes Stimulus–Response Gain and  
810 Background Firing. *Journal of Neuroscience*, 35(20), 7750–7762.  
811 <https://doi.org/10.1523/JNEUROSCI.0268-15.2015>
- 812 Köhler, M. H. A., Demarchi, G., & Weisz, N. (2021). Cochlear activity in silent cue-target  
813 intervals shows a theta-rhythmic pattern and is correlated to attentional alpha  
814 and theta modulations. *BMC Biology*, 19(1), 48. [https://doi.org/10.1186/s12915-](https://doi.org/10.1186/s12915-021-00992-8)  
815 [021-00992-8](https://doi.org/10.1186/s12915-021-00992-8)
- 816 Kubetschek, C., & Kayser, C. (2021). Delta/Theta band EEG activity shapes the rhythmic  
817 perceptual sampling of auditory scenes. *Scientific Reports*, 11(1), 2370.  
818 <https://doi.org/10.1038/s41598-021-82008-7>
- 819 Lachaux, J.-P., Rodriguez, E., Martinerie, J., & Varela, F. J. (1999). Measuring phase  
820 synchrony in brain signals. *Human Brain Mapping*, 8(4), 194–208.  
821 [https://doi.org/10.1002/\(SICI\)1097-0193\(1999\)8:4<194::AID-HBM4>3.0.CO;2-C](https://doi.org/10.1002/(SICI)1097-0193(1999)8:4<194::AID-HBM4>3.0.CO;2-C)
- 822 Lakatos, P., Shah, A. S., Knuth, K. H., Ulbert, I., Karmos, G., & Schroeder, C. E. (2005). An  
823 Oscillatory Hierarchy Controlling Neuronal Excitability and Stimulus Processing

- 824 in the Auditory Cortex. *Journal of Neurophysiology*, 94(3), 1904–1911.
- 825 <https://doi.org/10.1152/jn.00263.2005>
- 826 Landau, A. N., & Fries, P. (2012). Attention Samples Stimuli Rhythmically. *Current*
- 827 *Biology*, 22(11), 1000–1004. <https://doi.org/10/f32k6g>
- 828 Landau, A. N., Schreyer, H. M., van Pelt, S., & Fries, P. (2015). Distributed Attention Is
- 829 Implemented through Theta-Rhythmic Gamma Modulation. *Current Biology*,
- 830 25(17), 2332–2337. <https://doi.org/10.1016/j.cub.2015.07.048>
- 831 Lawrence, M. A. (2016). *Ez* (4.4-0) [R]. <https://cran.r-project.org/web/packages/ez/ez.pdf>
- 832 Lukas, J. H. (1980). Human Auditory Attention: The Olivocochlear Bundle May Function
- 833 as a Peripheral Filter. *Psychophysiology*, 17(5), 444–452. <https://doi.org/10/btz637>
- 834 Marcenaro, B. E., Leiva, A., Dragicevic, C. D., Lopez, V., & Delano, P. H. (2021). The
- 835 medial olivocochlear reflex strength is modulated during a visual working
- 836 memory task. *Journal of Neurophysiology*. <https://doi.org/10.1152/jn.00032.2020>
- 837 Meric, C., & Collet, L. (1992). Visual attention and evoked otoacoustic emissions: A slight
- 838 but real effect. *International Journal of Psychophysiology*, 12(3), 233–235.
- 839 [https://doi.org/10.1016/0167-8760\(92\)90061-F](https://doi.org/10.1016/0167-8760(92)90061-F)
- 840 Meric, C., & Collet, L. (1994). Attention and otoacoustic emissions: A review.
- 841 *Neuroscience and Biobehavioral Reviews*, 18(2), 215–222.
- 842 [https://doi.org/10.1016/0149-7634\(94\)90026-4](https://doi.org/10.1016/0149-7634(94)90026-4)
- 843 Ng, B. S. W., Schroeder, T., & Kayser, C. (2012). A Precluding But Not Ensuring Role of
- 844 Entrained Low-Frequency Oscillations for Auditory Perception. *Journal of*
- 845 *Neuroscience*, 32(35), 12268–12276. [https://doi.org/10.1523/JNEUROSCI.1877-](https://doi.org/10.1523/JNEUROSCI.1877-12.2012)
- 846 12.2012

- 847 Oostenveld, R., Fries, P., Maris, E., & Schoffelen, J. M. (2011). FieldTrip: Open source  
848 software for advanced analysis of MEG, EEG, and invasive electrophysiological  
849 data. *Computational Intelligence and Neuroscience*, 2011.  
850 <https://doi.org/10.1155/2011/156869>
- 851 Plöchl, M., Fiebelkorn, I., Kastner, S., & Obleser, J. (2021). Attentional sampling of visual  
852 and auditory objects is captured by theta-modulated neural activity. *European*  
853 *Journal of Neuroscience*, n/a(n/a). <https://doi.org/10.1111/ejn.15514>
- 854 Poeppel, D., & Assaneo, M. F. (2020). Speech rhythms and their neural foundations.  
855 *Nature Reviews Neuroscience*, 21(6), 322–334. [https://doi.org/10.1038/s41583-020-](https://doi.org/10.1038/s41583-020-0304-4)  
856 [0304-4](https://doi.org/10.1038/s41583-020-0304-4)
- 857 Poole, W., Gibbs, D. L., Shmulevich, I., Bernard, B., & Knijnenburg, T. A. (2016).  
858 Combining dependent P-values with an empirical adaptation of Brown's  
859 method. *Bioinformatics*, 32(17), i430–i436.  
860 <https://doi.org/10.1093/bioinformatics/btw438>
- 861 Puria, S. (2003). Measurements of human middle ear forward and reverse acoustics:  
862 Implications for otoacoustic emissions. *The Journal of the Acoustical Society of*  
863 *America*, 113(5), 2773–2789. <https://doi.org/10.1121/1.1564018>
- 864 R Core Team. (2021). *R: A language and environment for statistical computing* (4.1.2) [R]. R  
865 Foundation for Statistical Computing. <https://www.R-project.org/>
- 866 Romei, V., Brodbeck, V., Michel, C., Amedi, A., Pascual-Leone, A., & Thut, G. (2008).  
867 Spontaneous Fluctuations in Posterior  $\alpha$ -Band EEG Activity Reflect Variability in  
868 Excitability of Human Visual Areas. *Cerebral Cortex*, 18(9), 2010–2018.  
869 <https://doi.org/10.1093/cercor/bhm229>



- 870 Signorell, A. (2021). *DescTools* (0.99.44) [R]. <https://andrisignorell.github.io/DescTools/>
- 871 Spyropoulos, G., Bosman, C. A., & Fries, P. (2018). A theta rhythm in macaque visual  
872 cortex and its attentional modulation. *Proceedings of the National Academy of*  
873 *Sciences*, 115(24), E5614–E5623. <https://doi.org/10/gdqzqkq>
- 874 Srinivasan, S., Keil, A., Stratis, K., Osborne, A. F., Cerwonka, C., Wong, J., Rieger, B. L.,  
875 Polcz, V., & Smith, D. W. (2014). Interaural attention modulates outer hair cell  
876 function. *The European Journal of Neuroscience*, 40(12), 3785–3792.  
877 <https://doi.org/10.1111/ejn.12746>
- 878 Terreros, G., & Delano, P. H. (2015). Corticofugal modulation of peripheral auditory  
879 responses. *Frontiers in Systems Neuroscience*, 9(September), 134.  
880 <https://doi.org/10.3389/fnsys.2015.00134>
- 881 VanRullen, R. (2016). How to Evaluate Phase Differences between Trial Groups in  
882 Ongoing Electrophysiological Signals. *Frontiers in Neuroscience*, 10.  
883 <https://doi.org/10/gdvhq8>
- 884 Walsh, K. P., Pasanen, E. G., & McFadden, D. (2014). Selective attention reduces  
885 physiological noise in the external ear canals of humans. I: Auditory attention.  
886 *Hearing Research*, 312, 143–159. <https://doi.org/10.1016/j.heares.2014.03.012>
- 887 Walsh, K. P., Pasanen, E. G., & McFadden, D. (2015). Changes in otoacoustic emissions  
888 during selective auditory and visual attention. *The Journal of the Acoustical Society*  
889 *of America*, 137(5), 2737–2757. <https://doi.org/10.1121/1.4919350>
- 890 Ward, L. M. (1997). Involuntary Listening AIDS Hearing. *Psychological Science*, 8(2), 112–  
891 118. <https://doi.org/10.1111/j.1467-9280.1997.tb00692.x>
- 892 Wittekindt, A., Kaiser, J., & Abel, C. (2014). Attentional Modulation of the Inner Ear: A

- 893 Combined Otoacoustic Emission and EEG Study. *Journal of Neuroscience*, 34(30),  
894 9995–10002. <https://doi.org/10.1523/JNEUROSCI.4861-13.2014>
- 895 Woldorff, M., Hansen, J. C., & Hillyard, S. A. (1987). Evidence for effects of selective  
896 attention in the mid-latency range of the human auditory event-related  
897 potential. *Electroencephalography and Clinical Neurophysiology. Supplement*, 40,  
898 146–154.
- 899 Worsley, K. J., & Friston, K. J. (2000). A test for a conjunction. *Statistics & Probability*  
900 *Letters*, 47(2), 135–140. [https://doi.org/10.1016/S0167-7152\(99\)00149-2](https://doi.org/10.1016/S0167-7152(99)00149-2)
- 901 Wöstmann, M., Herrmann, B., Maess, B., & Obleser, J. (2016). Spatiotemporal dynamics  
902 of auditory attention synchronize with speech. *Proceedings of the National*  
903 *Academy of Sciences*, 113(14), 3873–3878.  
904 <https://doi.org/10.1073/pnas.1523357113>
- 905 Wyart, V., de Gardelle, V., Scholl, J., & Summerfield, C. (2012). Rhythmic Fluctuations in  
906 Evidence Accumulation during Decision Making in the Human Brain. *Neuron*,  
907 76(4), 847–858. <https://doi.org/10.1016/j.neuron.2012.09.015>
- 908 Zoefel, B., & Heil, P. (2013). Detection of Near-Threshold Sounds is Independent of EEG  
909 Phase in Common Frequency Bands. *Frontiers in Psychology*, 4, 262.  
910 <https://doi.org/10.3389/fpsyg.2013.00262>
